# Supplementary material
Source: Springer Nature journal article supplement (https://www.springermedizin.de/resource/supplementary/12888_2012_1188_MOESM2_ESM.pdf/9480258)
Supplement: MOESM2 [file 9480258]

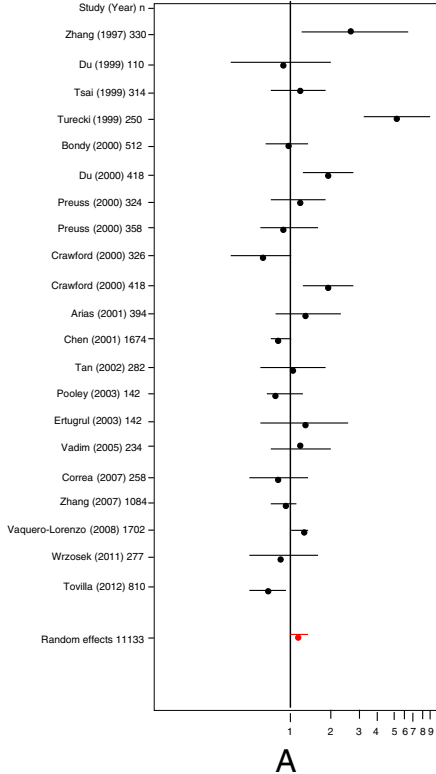

A

| Study (Year) n              | Weight (%) | OR   | CI (95%)    |
|-----------------------------|------------|------|-------------|
| Zhang (1997) 330            | 2.71       | 2.63 | (1.16,5.93) |
| Du (1999) 110               | 2.73       | 0.88 | (0.39,1.98) |
| Tsai (1999) 314             | 4.69       | 1.16 | (0.73,1.86) |
| Turecki (1999) 250          | 4.12       | 5.40 | (3.11,9.34) |
| Bondy (2000) 512            | 5.56       | 0.96 | (0.67,1.36) |
| Du (2000) 418               | 5.13       | 1.81 | (1.21,2.72) |
| Preuss (2000) 324           | 4.51       | 1.15 | (0.70,1.88) |
| Preuss (2000) 358           | 4.90       | 0.95 | (0.61,1.48) |
| Crawford (2000) 326         | 4.81       | 0.64 | (0.41,1.01) |
| Crawford (2000) 418         | 5.13       | 1.81 | (1.21,2.72) |
| Arias (2001) 394            | 4.13       | 1.31 | (0.76,2.28) |
| Chen (2001) 1674            | 6.53       | 0.87 | (0.70,1.08) |
| Tan (2002) 282              | 4.28       | 1.04 | (0.62,1.77) |
| Pooley (2003) 142           | 5.97       | 0.90 | (0.67,1.21) |
| Ertugrul (2003) 142         | 3.34       | 1.25 | (0.63,2.47) |
| Vadim (2005) 234            | 4.34       | 1.21 | (0.72,2.02) |
| Correa (2007) 258           | 4.30       | 0.86 | (0.51,1.46) |
| Zhang (2007) 1084           | 6.36       | 0.91 | (0.71,1.15) |
| Vaquero-Lorenzo (2008) 1702 | 6.67       | 1.22 | (1.00,1.47) |
| Wrzosek (2011) 277          | 3.85       | 0.89 | (0.49,1.62) |
| Tovilla (2012) 810          | 5.83       | 0.68 | (0.50,0.94) |
| Random effects 11133        |            | 1.14 | (0.96,1.35) |

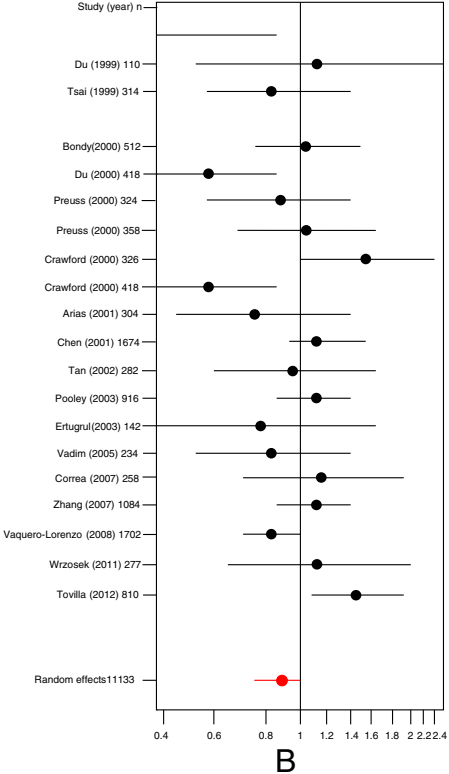

B

| Study (Year) n              | Weight (%) | OR   | CI (95%)    |
|-----------------------------|------------|------|-------------|
| Du (1999) 110               | 2.71       | 0.88 | (0.39,1.98) |
| Tsai (1999) 314             | 2.73       | 1.16 | (0.73,1.86) |
| Bondy(2000) 512             | 4.12       | 0.96 | (0.67,1.36) |
| Du (2000) 418               | 5.56       | 1.81 | (1.21,2.72) |
| Preuss (2000) 324           | 5.13       | 1.15 | (0.70,1.88) |
| Preuss (2000) 358           | 4.51       | 0.95 | (0.61,1.48) |
| Crawford (2000) 326         | 4.90       | 0.64 | (0.41,1.01) |
| Crawford (2000) 418         | 4.81       | 1.81 | (1.21,2.72) |
| Arias (2001) 304            | 5.13       | 1.31 | (0.76,2.28) |
| Chen (2001) 1674            | 5.13       | 0.87 | (0.70,1.08) |
| Tan (2002) 282              | 4.28       | 1.04 | (0.62,1.77) |
| Pooley (2003) 916           | 4.28       | 0.90 | (0.67,1.21) |
| Ertugrul(2003) 142          | 5.97       | 1.25 | (0.63,2.47) |
| Vadim (2005) 234            | 4.34       | 1.21 | (0.72,2.02) |
| Correa (2007) 258           | 4.30       | 0.86 | (0.51,1.46) |
| Zhang (2007) 1084           | 4.30       | 0.91 | (0.71,1.15) |
| Vaquero-Lorenzo (2008) 1702 | 6.36       | 1.22 | (1.00,1.47) |
| Wrzosek (2011) 277          | 6.67       | 0.89 | (0.49,1.62) |
| Tovilla (2012) 810          | 6.67       | 0.89 | (0.49,1.62) |
| Random effects 11133        | 5.83       | 0.68 | (0.50,0.94) |

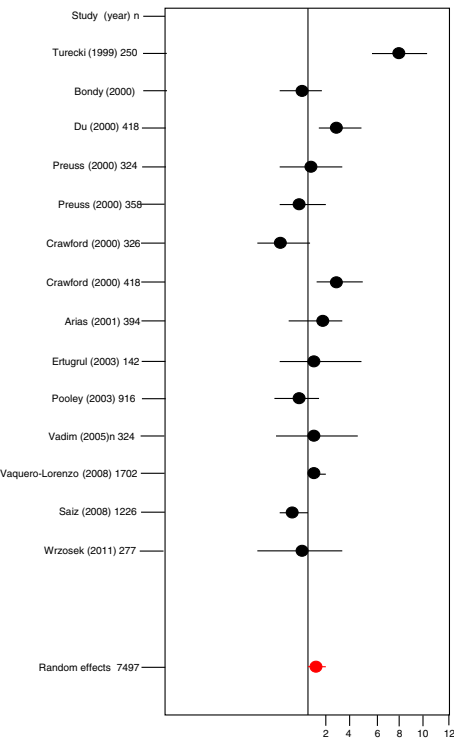

C

| Study (Year) n              | Weight (%) | OR   | CI (95%)    |
|-----------------------------|------------|------|-------------|
| Turecki (1999) 250          | 6.15       | 5.40 | (3.11,9.34) |
| Bondy (2000)                | 7.96       | 0.96 | (0.67,1.36) |
| Du (2000) 418               | 7.43       | 1.81 | (1.21,2.72) |
| Preuss (2000) 324           | 6.66       | 1.15 | (0.70,1.88) |
| Preuss (2000) 358           | 7.15       | 0.95 | (0.61,1.48) |
| Crawford (2000) 326         | 7.04       | 0.64 | (0.41,1.01) |
| Crawford (2000) 418         | 7.43       | 1.81 | (1.21,2.72) |
| Arias (2001) 394            | 6.17       | 1.31 | (0.76,2.28) |
| Ertugrul (2003) 142         | 5.12       | 1.25 | (0.63,2.47) |
| Pooley (2003) 916           | 8.44       | 0.90 | (0.67,1.21) |
| Vadim (2005)n 324           | 6.45       | 1.21 | (0.72,2.02) |
| Vaquero-Lorenzo (2008) 1702 | 9.25       | 1.22 | (1.00,1.47) |
| Saiz (2008) 1226            | 8.88       | 0.84 | (0.66,1.07) |
| Wrzosek (2011) 277          | 5.80       | 0.89 | (0.49,1.62) |
| Random effects 7497         |            | 1.21 | (0.97,1.51) |

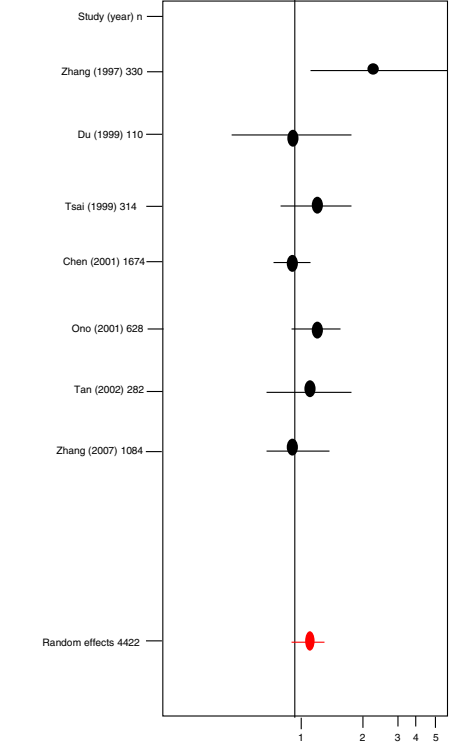

D

| Study (Year) n      | Weight (%) | OR   | CI (95%)    |
|---------------------|------------|------|-------------|
| Zhang (1997) 330    | 4.21       | 2.63 | (1.16,5.93) |
| Du (1999) 110       | 4.26       | 0.88 | (0.39,1.98) |
| Tsai (1999) 314     | 10.83      | 1.16 | (0.73,1.86) |
| Chen (2001) 1674    | 27.83      | 0.87 | (0.70,1.08) |
| Ono (2001) 628      | 18.77      | 1.16 | (0.85,1.59) |
| Tan (2002) 282      | 9.01       | 1.04 | (0.62,1.77) |
| Zhang (2007) 1084   | 25.05      | 0.91 | (0.71,1.15) |
| Random effects 4422 |            | 1.02 | (0.86,1.22) |
